# Supplementary material for: Simulation of the In Vivo Fate of Polymeric Nanoparticles Traced by Environment-Responsive Near-Infrared Dye: A Physiologically Based Pharmacokinetic Modelling Approach
Source: PubMed Central journal article supplement (PMC7956253; doi:10.3390/molecules26051271), 2021-02-26
Supplement: molecules-26-01271-s001.pdf [file molecules-26-01271-s001.pdf]

# Simulation of the *in Vivo* Fate of Polymeric Nanoparticles Traced by Environment-Responsive Near-Infrared Dye: A Physiologically Based Pharmacokinetic Modelling Approach

**Table S1.** Compositions and physicochemical properties of mPEG-PCL nanoparticles

|                                             | Nanoparticle formulation code |                            |                            |                            |                             |
|---------------------------------------------|-------------------------------|----------------------------|----------------------------|----------------------------|-----------------------------|
|                                             | mPEG <sub>5k</sub> -28.57%-   | mPEG <sub>5k</sub> -28.57- | mPEG <sub>5k</sub> -9.09%- | mPEG <sub>5k</sub> -9.09%- | mPEG <sub>2k</sub> -28.57%- |
|                                             | 200 nm                        | 80 nm                      | 200 nm                     | 80 nm                      | 200 nm                      |
| mPEG <sub>5k</sub> -PCL <sub>45k</sub> (mg) | 80                            | 80                         | 20                         | 20                         | /                           |
| mPEG <sub>2k</sub> -PCL <sub>45k</sub> (mg) | /                             | /                          | /                          | /                          | 40                          |
| PCL (mg)                                    | 200                           | 200                        | 200                        | 200                        | 200                         |
| P2 ( $\mu$ g)                               | 100                           | 100                        | 100                        | 100                        | 100                         |
| mPEG-PCL content (%)                        | 28.57                         | 28.57                      | 9.09                       | 9.09                       | 28.57                       |
| mPEG-PCL/PCL                                | 4/10                          | 4/10                       | 1/10                       | 1/10                       | 4/10                        |
| Particle size (nm) <sup>a</sup>             | 213.70±3.32                   | 84.89±2.85                 | 201.87±6.64                | 77.48±3.91                 | 207.60±3.28                 |
| PDI <sup>a</sup>                            | 0.03                          | 0.15                       | 0.05                       | 0.12                       | 0.06                        |
| Zeta potential (mV) <sup>a</sup>            | -3.59±0.39                    | -3.44±0.27                 | -2.80±0.23                 | -2.403±0.31                | -4.11±0.12                  |

<sup>a</sup> Measured at 25 °C after dilution with purified water by 20 folds. All measurements were conducted in triplicate.

**Table S2.** Linear relationship between fluorescence and concentrations of nanoparticles in various organs and tissues

|        | mPEG <sub>5k</sub> -28.57%-80nm                                            | mPEG <sub>5k</sub> -9.09%-80nm                                             | mPEG <sub>5k</sub> -28.57%-200nm                                           | mPEG <sub>5k</sub> -9.09%-200nm                                            | mPEG <sub>2k</sub> -28.57%-200nm                                           |
|--------|----------------------------------------------------------------------------|----------------------------------------------------------------------------|----------------------------------------------------------------------------|----------------------------------------------------------------------------|----------------------------------------------------------------------------|
| heart  | Y=4.207*10 <sup>8</sup> C+9.055*10 <sup>5</sup><br>R <sup>2</sup> = 0.9755 | Y=4.043*10 <sup>8</sup> C+8.828*10 <sup>5</sup><br>R <sup>2</sup> = 0.9756 | Y=7.070*10 <sup>8</sup> C+6.549*10 <sup>5</sup><br>R <sup>2</sup> = 0.9751 | Y=6.676*10 <sup>8</sup> C+7.421*10 <sup>5</sup><br>R <sup>2</sup> = 0.9757 | Y=6.721*10 <sup>8</sup> C+7.314*10 <sup>5</sup><br>R <sup>2</sup> = 0.9817 |
| liver  | Y=9.995*10 <sup>8</sup> C-1.344*10 <sup>7</sup><br>R <sup>2</sup> = 0.9963 | Y=1.006*10 <sup>9</sup> +1.422*10 <sup>6</sup><br>R <sup>2</sup> = 0.9992  | Y=2.071*10 <sup>9</sup> C+1.981*10 <sup>6</sup><br>R <sup>2</sup> = 0.9982 | Y=2.228*10 <sup>9</sup> C-1.625*10 <sup>7</sup><br>R <sup>2</sup> = 0.9982 | Y=1.955*10 <sup>9</sup> C-1.281*10 <sup>6</sup><br>R <sup>2</sup> = 0.9876 |
| spleen | Y=4.849*10 <sup>8</sup> C-1.520*10 <sup>7</sup><br>R <sup>2</sup> = 0.9865 | Y=4.911*10 <sup>8</sup> C-4.324*10 <sup>6</sup><br>R <sup>2</sup> = 0.9835 | Y=9.223*10 <sup>8</sup> C+1.472*10 <sup>7</sup><br>R <sup>2</sup> = 0.9995 | Y=9.420*10 <sup>8</sup> C-3.449*10 <sup>6</sup><br>R <sup>2</sup> = 0.9938 | Y=9.085*10 <sup>8</sup> C+2.192*10 <sup>6</sup><br>R <sup>2</sup> = 0.9925 |
| lung   | Y=1.899*10 <sup>9</sup> C+7.940*10 <sup>6</sup><br>R <sup>2</sup> = 0.9941 | Y=2.215*10 <sup>9</sup> C+1.266*10 <sup>7</sup><br>R <sup>2</sup> = 0.9979 | Y=3.606*10 <sup>9</sup> C-3.716*10 <sup>6</sup><br>R <sup>2</sup> = 0.9938 | Y=3.366*10 <sup>9</sup> C+1.197*10 <sup>7</sup><br>R <sup>2</sup> = 0.9984 | Y=3.868*10 <sup>9</sup> C+4.425*10 <sup>7</sup><br>R <sup>2</sup> = 0.9960 |
| kidney | Y=8.513*10 <sup>8</sup> C+6.180*10 <sup>6</sup><br>R <sup>2</sup> = 0.9956 | Y=9.300*10 <sup>8</sup> C+1.032*10 <sup>7</sup><br>R <sup>2</sup> = 0.9997 | Y=1.543*10 <sup>9</sup> C+5.304*10 <sup>6</sup><br>R <sup>2</sup> = 0.9971 | Y=1.742*10 <sup>9</sup> C+1.338*10 <sup>6</sup><br>R <sup>2</sup> = 0.9979 | Y=1.591*10 <sup>9</sup> C+8.401*10 <sup>5</sup><br>R <sup>2</sup> = 0.9908 |
| tumor  | Y=2.084*10 <sup>9</sup> C+8.987*10 <sup>5</sup><br>R <sup>2</sup> = 0.9983 | Y=1.945*10 <sup>9</sup> C-7.943*10 <sup>6</sup><br>R <sup>2</sup> = 0.9978 | Y=3.891*10 <sup>9</sup> C-6.382*10 <sup>6</sup><br>R <sup>2</sup> = 0.9979 | Y=3.559*10 <sup>9</sup> C-6.632*10 <sup>5</sup><br>R <sup>2</sup> = 0.9991 | Y=3.449*10 <sup>9</sup> C+9.662*10 <sup>6</sup><br>R <sup>2</sup> = 0.9994 |
| blood  | Y=8.899*10 <sup>8</sup> C-4.916*10 <sup>7</sup><br>R <sup>2</sup> = 0.9988 | Y=9.170*10 <sup>8</sup> C-8.731*10 <sup>6</sup><br>R <sup>2</sup> = 0.9985 | Y=1.609*10 <sup>9</sup> C-1.578*10 <sup>5</sup><br>R <sup>2</sup> = 0.9999 | Y=1.959*10 <sup>9</sup> C+1.488*10 <sup>7</sup><br>R <sup>2</sup> = 0.9998 | Y=2.106*10 <sup>9</sup> C-8.926*10 <sup>6</sup><br>R <sup>2</sup> = 0.9992 |

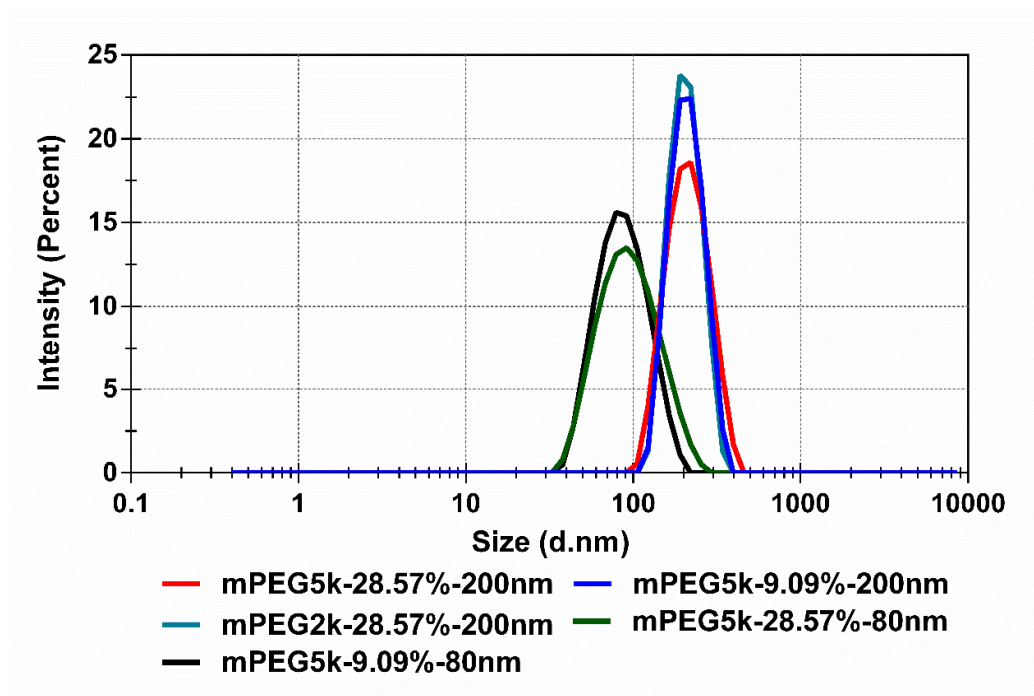

Figure S1. Size distributions of various mPEG-PCL nanoparticles encapsulating P2.

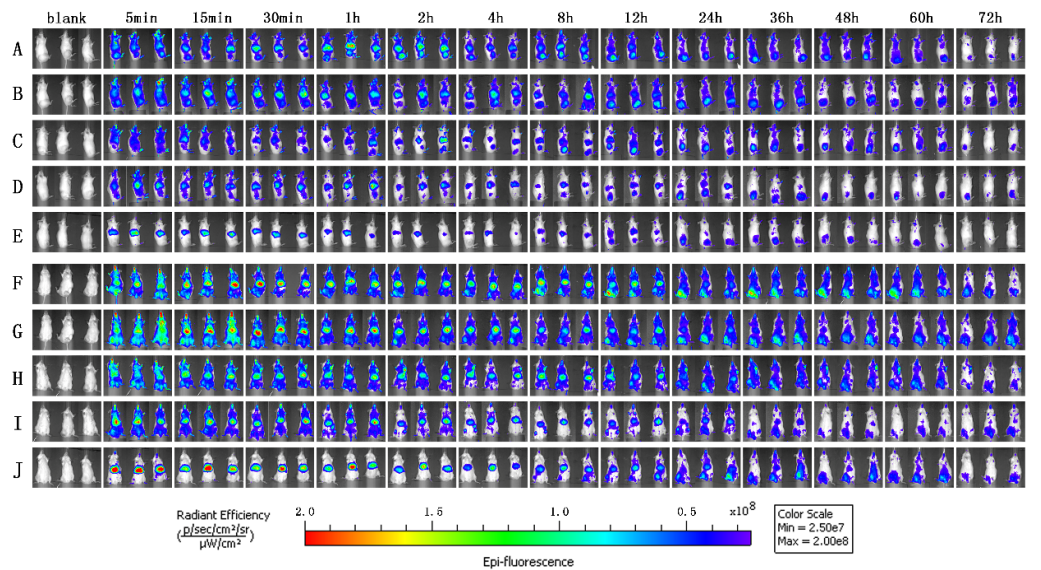

A F: mPEG5k-28.57%-80nm B G: mPEG5k-9.09%-80nm C H: mPEG5k-28.57%-200nm D I: mPEG2k-28.57%-200nm E J: mPEG5k-9.09%-200nm

Figure S2. Whole animal imaging of S180 tumor bearing mice after intravenous administration of mPEG-PCL nanoparticles at the lateral position (A-E) and supine position (F-J).

Table S3. Physiological parameters used in the PBPK model for NPs in mice<sup>1-3</sup>

| Parameter (unit) | Value |
|------------------|-------|
|------------------|-------|

|                                                                    |                    |
|--------------------------------------------------------------------|--------------------|
| body weight (kg)                                                   | 0.04 <sup>a</sup>  |
| cardiac output(L/h/kg <sup>0.75</sup> )                            | 16.5               |
| <b>Blood flow to organ (fraction of cardiac output, unitless)</b>  |                    |
| Heart                                                              | 0.066              |
| Liver                                                              | 0.161              |
| Spleen                                                             | 0.01125            |
| Lung                                                               | 1                  |
| Kidney                                                             | 0.091              |
| Tumor                                                              | 0.0125             |
| <b>Organ volumes (fraction of body weight, unitless)</b>           |                    |
| Heart                                                              | 0.005              |
| Liver                                                              | 0.0549             |
| Spleen                                                             | 0.005              |
| Lung                                                               | 0.007              |
| Kidney                                                             | 0.0167             |
| Tumor                                                              | 0.055 <sup>a</sup> |
| Blood                                                              | 0.085              |
| <b>Volume fraction of interstitial tissue in organs (unitless)</b> |                    |
| Heart                                                              | 0.143              |
| Liver                                                              | 0.26               |
| Spleen                                                             | 0.2                |
| Lung                                                               | 0.3                |
| Kidney                                                             | 0.34               |
| Tumor                                                              | 0.38               |
| Rest of body                                                       | 0.21               |
| <b>Volume fraction of blood in organs (unitless)</b>               |                    |
| Heart                                                              | 0.34 <sup>b</sup>  |
| Liver                                                              | 0.31               |
| Spleen                                                             | 0.17               |
| Lung                                                               | 0.5                |
| Kidney                                                             | 0.24               |
| Tumor                                                              | 0.035 <sup>b</sup> |
| Rest of body                                                       | 0.04               |

---

a. Data are measured experimentally

b. Data are obtained by fitting in the software based on *in vivo* observations

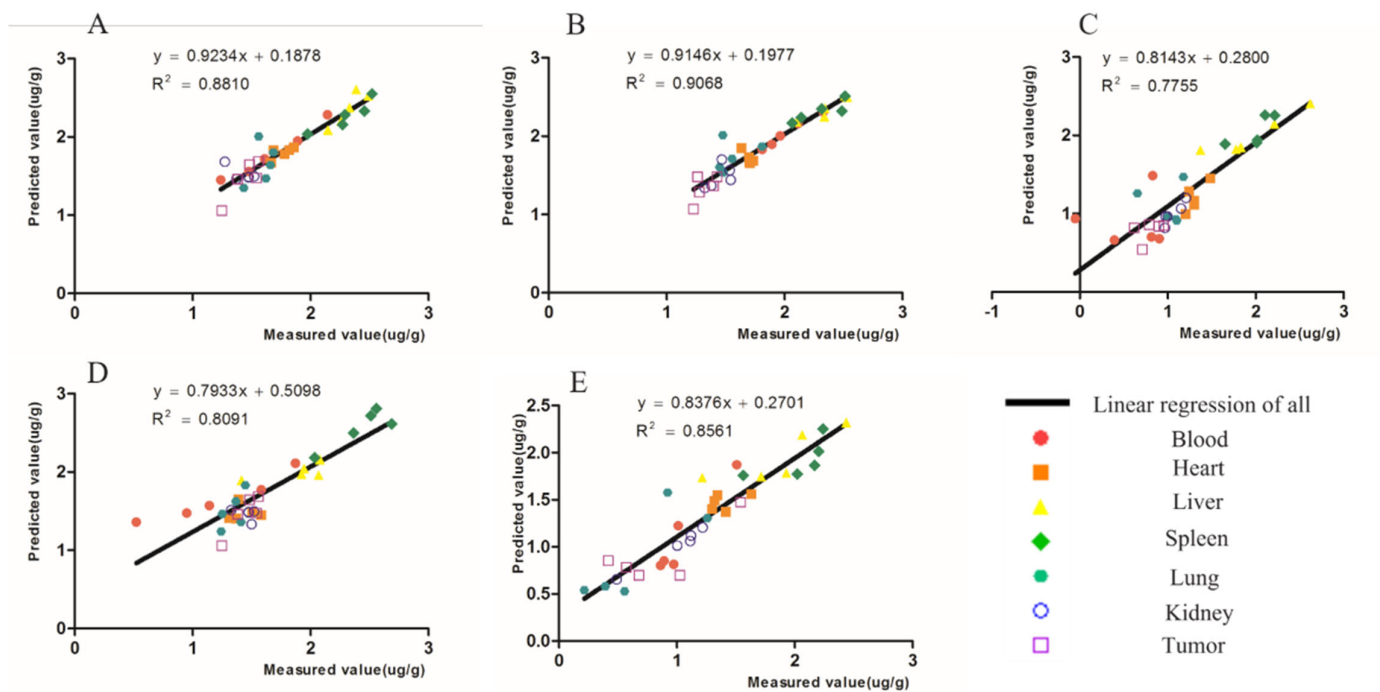

**Figure S3.** Goodness-of-fit plot of the linear regression analysis of model predictions and experimental data after intravenous injection for model calibration. Measured values are from our own experimental data. mPEG5k-9.09%-80nm NPs (A), mPEG5k-28.57%-80nm NPs (B), mPEG5k-9.09%-200nm NPs (C), mPEG5k-28.57%-200nm NPs (D) and mPEG2k-28.57%-200nm NPs (E).

Table S4. Relative sensitive analyses for the parameters of mPEG5k-9.09%-80nm NPs

| Parameters | Blood        | Heart        | Liver        | Spleen       | Lung         | Kidney       | Tumor        | Body         |
|------------|--------------|--------------|--------------|--------------|--------------|--------------|--------------|--------------|
| BW         | <b>-0.98</b> | <b>-0.98</b> | <b>-1.00</b> | <b>-0.99</b> | <b>-0.99</b> | <b>-0.99</b> | <b>-0.99</b> | <b>-0.98</b> |
| IV         | <b>1.00</b>  | <b>0.98</b>  | <b>1.00</b>  | <b>1.02</b>  | <b>1.00</b>  | <b>0.99</b>  | <b>0.99</b>  | <b>1.01</b>  |
| VLC        | -0.17        | -0.18        | -0.19        | -0.16        | -0.17        | -0.19        | -0.18        | -0.17        |
| VBloodC    | -0.01        | 0.00         | -0.02        | 0.00         | -0.01        | -0.03        | -0.02        | 0.00         |
| Pt         | 0.00         | 0.00         | 0.00         | 0.00         | 0.00         | 0.00         | 0.00         | 0.00         |
| PACt       | 0.00         | 0.00         | 0.00         | 0.00         | 0.00         | 0.00         | 0.00         | 0.00         |
| KupLumax   | 0.00         | 0.00         | 0.00         | 0.00         | 0.36         | 0.00         | 0.00         | 0.00         |
| KupLu50    | 0.00         | 0.00         | 0.00         | 0.00         | 0.00         | 0.00         | 0.00         | 0.00         |
| KupLun     | 0.00         | 0.00         | 0.00         | 0.00         | 0.00         | 0.00         | 0.00         | 0.00         |
| KoutLu     | 0.00         | 0.00         | 0.00         | 0.00         | -0.34        | 0.00         | 0.00         | 0.01         |
| KupHmax    | 0.00         | <b>0.80</b>  | -0.02        | 0.00         | 0.00         | -0.01        | -0.01        | 0.00         |
| KupH50     | 0.00         | 0.00         | 0.00         | 0.00         | 0.00         | 0.00         | 0.00         | 0.00         |
| KupHn      | 0.00         | 0.06         | 0.00         | 0.00         | 0.00         | 0.00         | 0.00         | 0.00         |
| KoutH      | 0.01         | -0.37        | 0.00         | 0.00         | 0.00         | 0.00         | 0.00         | 0.01         |
| KupTmax    | -0.04        | -0.06        | -0.05        | -0.03        | -0.04        | -0.04        | <b>0.90</b>  | -0.04        |
| KupT50     | 0.00         | 0.00         | 0.00         | 0.00         | 0.00         | 0.00         | 0.00         | 0.00         |
| KupTn      | 0.00         | 0.00         | 0.00         | 0.00         | 0.00         | 0.00         | 0.01         | 0.00         |
| KoutT      | 0.04         | 0.06         | 0.02         | 0.05         | 0.04         | 0.03         | <b>-0.79</b> | 0.05         |
| KupLmax    | -0.19        | -0.18        | <b>0.71</b>  | -0.19        | -0.20        | -0.21        | -0.21        | -0.19        |
| KupL50     | 0.00         | 0.00         | 0.00         | 0.00         | 0.00         | 0.00         | 0.00         | 0.00         |
| KupLn      | 0.00         | 0.00         | 0.00         | 0.00         | 0.00         | 0.00         | 0.00         | 0.00         |
| KoutL      | 0.19         | 0.24         | <b>-0.74</b> | 0.21         | 0.20         | 0.20         | 0.20         | 0.20         |
| KupSmax    | -0.01        | 0.00         | -0.02        | <b>0.94</b>  | -0.01        | -0.03        | -0.02        | -0.01        |
| KupS50     | 0.00         | 0.00         | 0.00         | 0.00         | 0.00         | 0.00         | 0.00         | 0.00         |
| KupSn      | 0.00         | 0.00         | 0.00         | 0.00         | 0.00         | 0.00         | 0.00         | 0.00         |
| KoutS      | 0.02         | 0.00         | 0.00         | <b>-0.91</b> | 0.01         | 0.01         | 0.01         | 0.02         |
| KupKmax    | 0.00         | 0.00         | 0.00         | 0.00         | 0.00         | <b>0.67</b>  | 0.00         | 0.00         |
| KupK50     | 0.00         | 0.00         | 0.00         | 0.00         | 0.00         | -0.01        | 0.00         | 0.00         |
| KupKn      | 0.00         | 0.00         | 0.00         | 0.00         | 0.00         | 0.05         | 0.00         | 0.00         |
| KoutK      | 0.00         | 0.00         | 0.00         | 0.00         | 0.00         | -0.36        | 0.00         | 0.01         |
| KupBomax   | <b>-0.56</b> | <b>-0.55</b> | <b>-0.57</b> | <b>-0.56</b> | <b>-0.57</b> | <b>-0.55</b> | <b>-0.55</b> | 0.34         |
| KupBo50    | 0.07         | 0.06         | 0.07         | 0.08         | 0.07         | 0.07         | 0.07         | -0.04        |
| KupBon     | -0.12        | -0.12        | -0.14        | -0.13        | -0.13        | -0.12        | -0.12        | 0.08         |
| KoutBo     | 0.36         | 0.31         | 0.36         | 0.35         | 0.36         | 0.30         | 0.32         | -0.20        |

Table S5. Relative sensitive analyses for the parameters of mPEG5k-28.57%-80nm NPs

| Parameters      | Blood        | Heart        | Liver        | Spleen       | Lung         | Kidney       | Tumor        | Body         |
|-----------------|--------------|--------------|--------------|--------------|--------------|--------------|--------------|--------------|
| <b>BW</b>       | <b>-1.00</b> | <b>-1.02</b> | <b>-0.98</b> | <b>-0.98</b> | <b>-0.92</b> | <b>-0.99</b> | <b>-1.00</b> | <b>-1.00</b> |
| <b>IV</b>       | <b>0.50</b>  | <b>0.51</b>  | <b>0.51</b>  | <b>0.51</b>  | <b>0.55</b>  | 0.49         | <b>0.50</b>  | 0.49         |
| <b>VLC</b>      | -0.20        | -0.17        | -0.18        | -0.19        | -0.18        | -0.21        | -0.21        | -0.19        |
| <b>VBloodC</b>  | -0.10        | -0.09        | -0.09        | -0.09        | -0.09        | -0.12        | -0.11        | -0.10        |
| <b>Pt</b>       | 0.00         | 0.00         | 0.00         | 0.00         | 0.00         | 0.00         | 0.00         | 0.00         |
| <b>PACt</b>     | 0.00         | 0.00         | 0.00         | 0.00         | 0.00         | 0.00         | 0.00         | 0.00         |
| <b>KupLumax</b> | 0.00         | 0.00         | 0.00         | 0.00         | 0.09         | 0.00         | 0.00         | 0.00         |
| <b>KupLu50</b>  | 0.00         | 0.00         | 0.00         | 0.00         | 0.00         | 0.00         | 0.00         | 0.00         |
| <b>KupLun</b>   | 0.00         | 0.00         | 0.00         | 0.00         | 0.00         | 0.00         | 0.00         | 0.00         |
| <b>KoutLu</b>   | 0.00         | 0.00         | 0.00         | 0.00         | 0.00         | 0.00         | 0.00         | 0.00         |
| <b>KupHmax</b>  | 0.00         | <b>0.60</b>  | 0.00         | 0.00         | 0.00         | -0.01        | 0.00         | -0.01        |
| <b>KupH50</b>   | 0.00         | 0.00         | 0.00         | 0.00         | 0.00         | 0.00         | 0.00         | 0.00         |
| <b>KupHn</b>    | 0.00         | 0.00         | 0.00         | 0.00         | 0.00         | 0.00         | 0.00         | 0.00         |
| <b>KoutH</b>    | 0.00         | -0.17        | 0.00         | 0.00         | 0.00         | 0.00         | 0.00         | 0.00         |
| <b>KupTmax</b>  | -0.05        | 0.00         | -0.02        | -0.02        | 0.00         | -0.03        | <b>0.73</b>  | -0.03        |
| <b>KupT50</b>   | 0.00         | 0.00         | 0.00         | 0.00         | 0.00         | 0.00         | 0.00         | 0.00         |
| <b>KupTn</b>    | 0.00         | 0.00         | 0.00         | 0.00         | 0.00         | 0.00         | 0.00         | 0.00         |
| <b>KoutT</b>    | 0.00         | 0.00         | 0.02         | 0.02         | 0.09         | 0.01         | <b>-0.69</b> | 0.01         |
| <b>KupLmax</b>  | -0.20        | -0.17        | <b>0.65</b>  | -0.19        | -0.18        | -0.21        | -0.21        | -0.20        |
| <b>KupL50</b>   | 0.00         | 0.00         | 0.00         | 0.00         | 0.00         | 0.00         | 0.00         | 0.00         |
| <b>KupLn</b>    | 0.00         | 0.00         | 0.00         | 0.00         | 0.00         | 0.00         | 0.00         | 0.00         |
| <b>KoutL</b>    | 0.20         | 0.17         | <b>-0.65</b> | 0.21         | 0.27         | 0.19         | 0.19         | 0.19         |
| <b>KupSmax</b>  | -0.05        | 0.00         | 0.00         | <b>0.82</b>  | 0.00         | -0.01        | -0.02        | -0.03        |
| <b>KupS50</b>   | 0.00         | 0.00         | 0.00         | 0.00         | 0.00         | 0.00         | 0.00         | 0.00         |
| <b>KupSn</b>    | 0.00         | 0.00         | 0.00         | 0.00         | 0.00         | 0.00         | 0.00         | 0.00         |
| <b>KoutS</b>    | 0.00         | 0.00         | 0.02         | <b>-0.86</b> | 0.09         | 0.01         | 0.02         | 0.01         |
| <b>KupKmax</b>  | 0.00         | 0.00         | 0.00         | 0.00         | 0.00         | 0.13         | 0.00         | 0.00         |
| <b>KupK50</b>   | 0.00         | 0.00         | 0.00         | 0.00         | 0.00         | -0.01        | 0.00         | 0.00         |
| <b>KupKn</b>    | 0.00         | 0.00         | 0.00         | 0.00         | 0.00         | 0.00         | 0.00         | 0.00         |
| <b>KoutK</b>    | 0.00         | 0.00         | 0.00         | 0.00         | 0.00         | -0.07        | 0.00         | 0.00         |
| <b>KupBomax</b> | -0.45        | -0.43        | -0.43        | -0.42        | -0.37        | -0.43        | -0.42        | 0.35         |
| <b>KupBo50</b>  | 0.05         | 0.09         | 0.07         | 0.07         | 0.09         | 0.06         | 0.06         | -0.05        |
| <b>KupBon</b>   | -0.10        | -0.09        | -0.07        | -0.07        | 0.00         | -0.07        | -0.08        | 0.05         |
| <b>KoutBo</b>   | 0.30         | 0.26         | 0.31         | 0.33         | 0.37         | 0.30         | 0.31         | -0.27        |

Table S6. Relative sensitive analyses for the parameters of mPEG5k-9.09%-200nm NPs

| Parameters | Blood        | Heart        | Liver        | Spleen       | Lung         | Kidney       | Tumor        | Body        |
|------------|--------------|--------------|--------------|--------------|--------------|--------------|--------------|-------------|
| BW         | <b>1.01</b>  | <b>1.00</b>  | <b>1.01</b>  | <b>0.99</b>  | <b>0.97</b>  | <b>1.00</b>  | <b>1.02</b>  | <b>0.99</b> |
| IV         | <b>1.01</b>  | <b>1.00</b>  | <b>1.01</b>  | <b>0.99</b>  | <b>0.97</b>  | <b>1.00</b>  | <b>1.02</b>  | <b>0.99</b> |
| VLC        | -0.16        | -0.16        | -0.17        | -0.14        | -0.13        | -0.13        | -0.12        | -0.14       |
| VBloodC    | 0.08         | 0.06         | 0.06         | 0.05         | 0.04         | 0.07         | 0.06         | 0.06        |
| Pt         | 0.00         | 0.00         | 0.00         | 0.00         | 0.00         | 0.00         | 0.00         | 0.00        |
| PACt       | 0.00         | 0.00         | 0.00         | 0.00         | 0.00         | 0.00         | 0.00         | 0.00        |
| KupLumax   | 0.00         | 0.00         | 0.00         | 0.00         | <b>0.71</b>  | 0.00         | 0.00         | 0.00        |
| KupLu50    | 0.00         | 0.00         | 0.00         | 0.00         | 0.00         | 0.00         | 0.00         | 0.00        |
| KupLun     | 0.00         | 0.00         | 0.00         | 0.00         | 0.00         | 0.00         | 0.00         | 0.00        |
| KoutLu     | 0.00         | 0.00         | 0.00         | 0.00         | <b>-0.71</b> | 0.00         | 0.00         | 0.00        |
| KupHmax    | 0.00         | <b>0.90</b>  | 0.00         | 0.00         | 0.00         | 0.00         | 0.00         | -0.02       |
| KupH50     | 0.00         | -0.04        | 0.00         | 0.00         | 0.00         | 0.00         | 0.00         | 0.00        |
| KupHn      | 0.00         | 0.06         | 0.00         | 0.00         | 0.00         | 0.00         | 0.00         | 0.00        |
| KoutH      | 0.00         | -0.43        | 0.00         | 0.00         | 0.00         | 0.00         | 0.00         | 0.00        |
| KupTmax    | 0.00         | -0.02        | 0.00         | -0.05        | -0.04        | 0.00         | <b>0.96</b>  | -0.02       |
| KupT50     | 0.00         | 0.00         | 0.00         | 0.00         | 0.00         | 0.00         | -0.06        | 0.00        |
| KupTn      | 0.00         | 0.00         | 0.00         | 0.00         | 0.00         | 0.00         | 0.18         | 0.00        |
| KoutT      | 0.00         | 0.02         | 0.00         | 0.00         | 0.00         | 0.03         | <b>-0.84</b> | 0.00        |
| KupLmax    | -0.16        | -0.20        | <b>0.79</b>  | -0.19        | -0.18        | -0.20        | -0.18        | -0.18       |
| KupL50     | 0.00         | 0.00         | 0.00         | 0.00         | 0.00         | 0.00         | 0.00         | 0.00        |
| KupLn      | 0.00         | -0.02        | 0.06         | -0.05        | -0.04        | 0.00         | 0.00         | -0.02       |
| KoutL      | 0.16         | 0.18         | <b>-0.79</b> | 0.19         | 0.18         | 0.20         | 0.18         | 0.18        |
| KupSmax    | 0.00         | -0.02        | 0.00         | <b>0.94</b>  | -0.04        | 0.00         | 0.00         | -0.02       |
| KupS50     | 0.00         | 0.00         | 0.00         | 0.00         | 0.00         | 0.00         | 0.00         | 0.00        |
| KupSn      | 0.00         | 0.00         | 0.00         | 0.00         | 0.00         | 0.00         | 0.00         | 0.00        |
| KoutS      | 0.00         | 0.02         | 0.00         | <b>-0.94</b> | 0.00         | 0.03         | 0.00         | 0.02        |
| KupKmax    | 0.00         | 0.00         | 0.00         | 0.00         | 0.00         | <b>0.90</b>  | 0.00         | 0.00        |
| KupK50     | 0.00         | 0.00         | 0.00         | 0.00         | 0.00         | 0.00         | 0.00         | 0.00        |
| KupKn      | 0.00         | 0.00         | 0.00         | 0.00         | 0.00         | 0.07         | 0.00         | 0.00        |
| KoutK      | 0.00         | 0.00         | 0.00         | 0.00         | 0.00         | -0.47        | 0.00         | 0.00        |
| KupBomax   | <b>-0.70</b> | <b>-0.70</b> | <b>-0.73</b> | <b>-0.70</b> | <b>-0.71</b> | <b>-0.70</b> | <b>-0.72</b> | 0.24        |
| KupBo50    | 0.08         | 0.06         | 0.06         | 0.05         | 0.04         | 0.07         | 0.06         | -0.02       |
| KupBon     | -0.16        | -0.14        | -0.11        | -0.14        | -0.13        | -0.13        | -0.12        | 0.04        |
| KoutBo     | <b>0.62</b>  | <b>0.59</b>  | <b>0.62</b>  | <b>0.61</b>  | <b>0.62</b>  | <b>0.60</b>  | <b>0.66</b>  | -0.22       |



Table S7. Relative sensitive analyses for the parameters of mPEG5k-28.57%-200nm NPs

| Parameters      | Blood        | Heart        | Liver        | Spleen       | Lung         | Kidney       | Tumor        | Body         |
|-----------------|--------------|--------------|--------------|--------------|--------------|--------------|--------------|--------------|
| <b>BW</b>       | <b>-0.97</b> | <b>-0.99</b> | <b>-0.99</b> | <b>-0.99</b> | <b>-1.00</b> | <b>-0.98</b> | <b>-1.00</b> | <b>-1.00</b> |
| <b>IV</b>       | <b>1.00</b>  | <b>0.99</b>  | <b>0.99</b>  | <b>0.99</b>  | <b>1.00</b>  | <b>1.01</b>  | <b>1.00</b>  | <b>0.98</b>  |
| <b>VLC</b>      | -0.17        | -0.19        | -0.17        | -0.20        | -0.20        | -0.21        | -0.19        | -0.12        |
| <b>VBloodC</b>  | -0.02        | -0.01        | -0.06        | -0.03        | -0.03        | -0.03        | -0.03        | 0.02         |
| <b>Pt</b>       | 0.00         | 0.00         | 0.00         | 0.00         | 0.00         | 0.00         | 0.00         | 0.00         |
| <b>PACt</b>     | 0.00         | 0.00         | 0.00         | 0.00         | 0.00         | 0.00         | 0.00         | 0.00         |
| <b>KupLumax</b> | 0.00         | 0.00         | 0.00         | 0.00         | 0.33         | 0.00         | 0.00         | 0.00         |
| <b>KupLu50</b>  | 0.00         | 0.00         | 0.00         | 0.00         | 0.00         | 0.00         | 0.00         | 0.00         |
| <b>KupLun</b>   | 0.00         | 0.00         | 0.00         | 0.00         | 0.00         | 0.00         | 0.00         | 0.00         |
| <b>KoutLu</b>   | 0.00         | 0.00         | 0.00         | 0.00         | -0.33        | 0.00         | 0.00         | 0.00         |
| <b>KupHmax</b>  | 0.00         | <b>0.79</b>  | 0.00         | -0.01        | 0.00         | 0.00         | 0.00         | -0.02        |
| <b>KupH50</b>   | 0.00         | -0.10        | 0.00         | 0.00         | 0.00         | 0.00         | 0.00         | 0.00         |
| <b>KupHn</b>    | 0.00         | 0.10         | 0.00         | 0.00         | 0.00         | 0.00         | 0.00         | 0.00         |
| <b>KoutH</b>    | 0.02         | <b>-0.66</b> | 0.00         | 0.00         | 0.00         | 0.00         | 0.00         | 0.00         |
| <b>KupTmax</b>  | -0.02        | -0.04        | -0.06        | -0.04        | -0.03        | -0.03        | <b>0.90</b>  | -0.05        |
| <b>KupT50</b>   | 0.02         | 0.00         | 0.00         | 0.00         | 0.00         | 0.00         | -0.09        | 0.00         |
| <b>KupTn</b>    | 0.00         | -0.01        | 0.00         | -0.01        | -0.03        | 0.00         | 0.22         | -0.02        |
| <b>KoutT</b>    | 0.00         | -0.01        | 0.00         | -0.01        | -0.03        | 0.00         | 0.22         | -0.02        |
| <b>KupLmax</b>  | -0.20        | -0.22        | <b>0.72</b>  | -0.21        | -0.23        | -0.23        | -0.22        | -0.16        |
| <b>KupL50</b>   | 0.00         | 0.00         | 0.00         | 0.00         | 0.00         | 0.00         | 0.00         | 0.00         |
| <b>KupLn</b>    | 0.00         | 0.00         | 0.00         | -0.01        | 0.00         | 0.00         | 0.00         | -0.02        |
| <b>KoutL</b>    | 0.20         | 0.19         | <b>-0.72</b> | 0.18         | 0.17         | 0.21         | 0.19         | 0.14         |
| <b>KupSmax</b>  | 0.20         | 0.19         | <b>-0.72</b> | 0.18         | 0.17         | 0.21         | 0.19         | 0.14         |
| <b>KupS50</b>   | 0.02         | 0.00         | 0.00         | -0.04        | 0.00         | 0.00         | 0.00         | 0.00         |
| <b>KupSn</b>    | 0.00         | -0.01        | 0.00         | 0.21         | -0.03        | -0.02        | -0.03        | -0.02        |
| <b>KoutS</b>    | 0.07         | 0.07         | 0.06         | <b>-0.88</b> | 0.07         | 0.07         | 0.06         | 0.05         |
| <b>KupKmax</b>  | 0.00         | 0.00         | 0.00         | 0.00         | 0.00         | <b>0.84</b>  | 0.00         | 0.00         |
| <b>KupK50</b>   | 0.00         | 0.00         | 0.00         | 0.00         | 0.00         | -0.02        | 0.00         | 0.00         |
| <b>KupKn</b>    | 0.00         | 0.00         | 0.00         | 0.00         | 0.00         | 0.09         | 0.00         | 0.00         |
| <b>KoutK</b>    | 0.00         | 0.00         | 0.00         | 0.00         | 0.00         | -0.47        | 0.00         | 0.00         |
| <b>KupBomax</b> | -0.47        | <b>-0.53</b> | <b>-0.50</b> | <b>-0.50</b> | <b>-0.50</b> | -0.44        | <b>-0.53</b> | 0.28         |
| <b>KupBo50</b>  | 0.30         | 0.31         | 0.28         | 0.29         | 0.27         | 0.28         | 0.31         | -0.19        |
| <b>KupBon</b>   | 0.20         | 0.22         | 0.17         | 0.18         | 0.17         | 0.23         | 0.19         | -0.12        |
| <b>KoutBo</b>   | 0.30         | 0.29         | 0.28         | 0.28         | 0.27         | 0.23         | 0.31         | -0.16        |

Table S8. Relative sensitive analyses for the parameters of mPEG5k-28.57%-200nm NPs

| Parameters | Blood        | Heart        | Liver        | Spleen       | Lung         | Kidney       | Tumor        | Body         |
|------------|--------------|--------------|--------------|--------------|--------------|--------------|--------------|--------------|
| <b>BW</b>  | <b>-0.99</b> | <b>-0.99</b> | <b>-0.96</b> | <b>-1.01</b> | <b>-0.98</b> | <b>-0.99</b> | <b>-1.03</b> | <b>-0.98</b> |
| <b>IV</b>  | <b>1.04</b>  | <b>1.00</b>  | <b>1.02</b>  | <b>1.01</b>  | <b>0.98</b>  | <b>0.99</b>  | <b>1.03</b>  | <b>1.00</b>  |
| VLC        | -0.10        | -0.13        | -0.13        | -0.18        | -0.10        | -0.15        | -0.16        | -0.10        |
| VBloodC    | 0.05         | 0.03         | 0.06         | 0.00         | 0.00         | 0.03         | 0.00         | 0.06         |
| Pt         | 0.00         | 0.00         | 0.00         | 0.00         | 0.00         | 0.00         | 0.00         | 0.00         |
| PACt       | 0.00         | 0.00         | 0.00         | 0.00         | 0.00         | 0.00         | 0.00         | 0.00         |
| KupLumax   | 0.00         | 0.00         | 0.00         | 0.00         | 0.00         | 0.00         | 0.00         | 0.00         |
| KupLu50    | 0.00         | 0.00         | 0.00         | 0.00         | 0.00         | 0.00         | 0.00         | 0.00         |
| KupLun     | 0.00         | 0.00         | 0.00         | 0.00         | 0.00         | 0.00         | 0.00         | 0.00         |
| KoutLu     | 0.00         | 0.00         | 0.00         | 0.00         | 0.00         | 0.00         | 0.00         | 0.00         |
| KupHmax    | 0.00         | <b>0.89</b>  | 0.00         | 0.00         | 0.00         | 0.00         | 0.00         | 0.00         |
| KupH50     | 0.00         | -0.03        | 0.00         | 0.00         | 0.00         | 0.00         | 0.00         | 0.00         |
| KupHn      | 0.00         | 0.06         | 0.00         | 0.00         | 0.00         | 0.00         | 0.00         | 0.00         |
| KoutH      | 0.05         | <b>-0.79</b> | 0.00         | 0.00         | 0.00         | 0.00         | 0.00         | 0.02         |
| KupTmax    | 0.00         | -0.02        | 0.00         | 0.00         | 0.00         | 0.00         | <b>0.95</b>  | 0.00         |
| KupT50     | 0.00         | 0.00         | 0.00         | 0.00         | 0.00         | 0.00         | -0.08        | 0.00         |
| KupTn      | 0.00         | 0.00         | 0.00         | 0.00         | 0.00         | 0.00         | 0.16         | 0.00         |
| KoutT      | 0.05         | 0.02         | 0.00         | 0.00         | 0.00         | 0.00         | <b>-0.87</b> | 0.02         |
| KupLmax    | -0.16        | -0.17        | <b>0.83</b>  | -0.18        | -0.20        | -0.18        | -0.16        | -0.14        |
| KupL50     | 0.05         | 0.02         | 0.00         | 0.00         | 0.00         | 0.00         | 0.00         | 0.00         |
| KupLn      | 0.00         | -0.02        | 0.06         | 0.00         | 0.00         | -0.03        | 0.00         | 0.00         |
| KoutL      | 0.21         | 0.16         | <b>-0.76</b> | 0.18         | 0.20         | 0.18         | 0.16         | 0.15         |
| KupSmax    | 0.00         | -0.02        | 0.00         | <b>0.95</b>  | 0.00         | -0.03        | 0.00         | 0.00         |
| KupS50     | 0.00         | 0.00         | 0.00         | 0.00         | 0.00         | 0.00         | 0.00         | 0.00         |
| KupSn      | 0.00         | 0.00         | 0.00         | 0.00         | 0.00         | 0.00         | 0.00         | 0.00         |
| KoutS      | 0.05         | 0.02         | 0.00         | <b>-0.95</b> | 0.00         | 0.00         | 0.00         | 0.02         |
| KupKmax    | 0.00         | 0.00         | 0.00         | 0.00         | 0.00         | <b>0.87</b>  | 0.00         | 0.00         |
| KupK50     | 0.00         | 0.00         | 0.00         | 0.00         | 0.00         | -0.03        | 0.00         | 0.00         |
| KupKn      | 0.00         | 0.00         | 0.00         | 0.00         | 0.00         | 0.09         | 0.00         | 0.00         |
| KoutK      | 0.00         | 0.00         | 0.00         | 0.00         | 0.00         | -0.45        | 0.00         | 0.00         |
| KupBomax   | <b>-0.68</b> | <b>-0.70</b> | <b>-0.70</b> | <b>-0.71</b> | <b>-0.69</b> | <b>-0.66</b> | <b>-0.71</b> | 0.21         |
| KupBo50    | 0.10         | 0.08         | 0.06         | 0.06         | 0.10         | 0.09         | 0.08         | -0.02        |
| KupBon     | -0.05        | -0.06        | -0.06        | -0.06        | -0.10        | -0.06        | -0.08        | 0.02         |
| KoutBo     | <b>0.62</b>  | <b>0.59</b>  | <b>0.64</b>  | <b>0.59</b>  | <b>0.59</b>  | <b>0.54</b>  | <b>0.63</b>  | -0.17        |

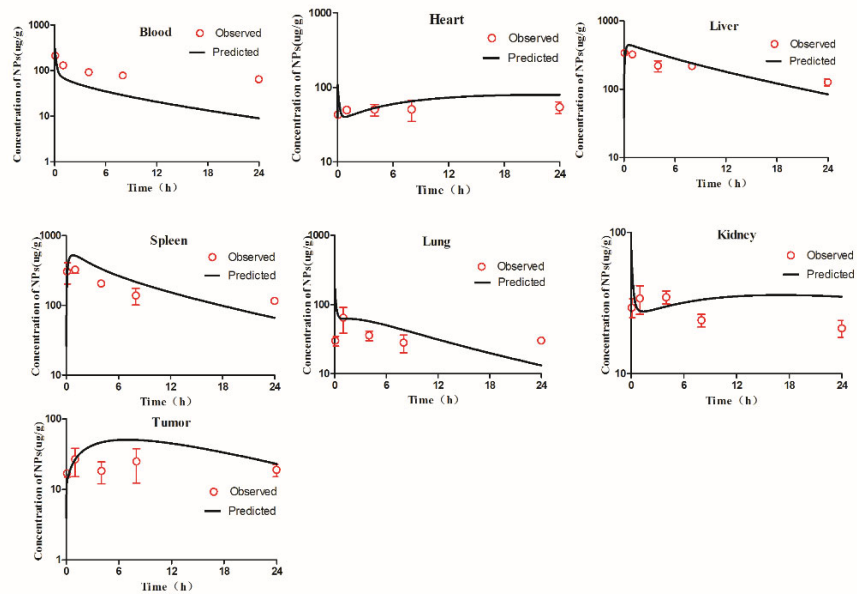

**Figure S4.** The simulated and experimentally measured concentration of mPEG5k-9.09%-80nm NPs in mice blood and tissues after intravenous injection. Simulation results are represented by solid lines in each panel, and the mean values of measured data are represented by red circles. Error bars represent standard deviation of experimentally measured data.

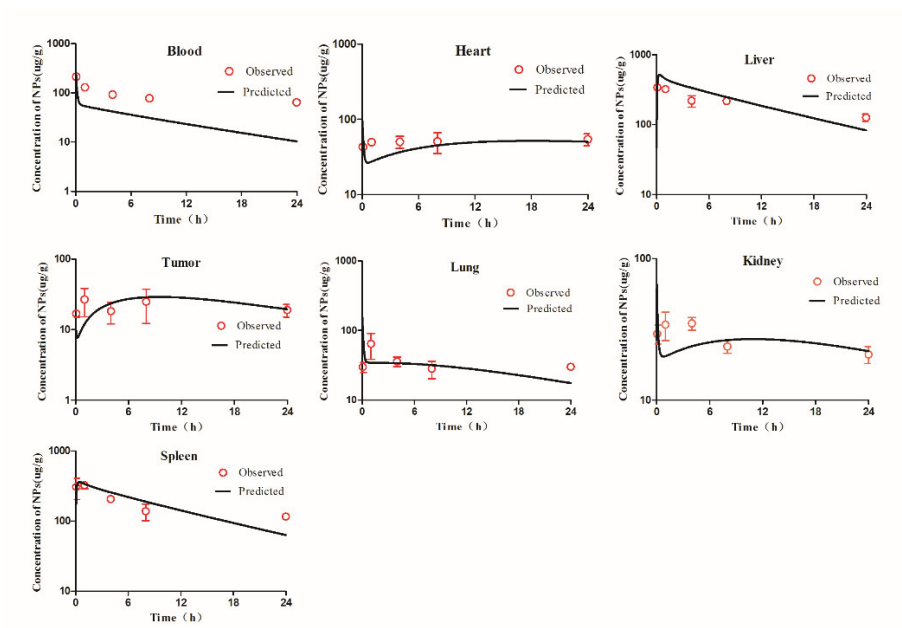

**Figure S5.** The simulated and experimentally measured concentration of mPEG5k-28.57%-80nm NPs in mice blood and tissues after intravenous injection.

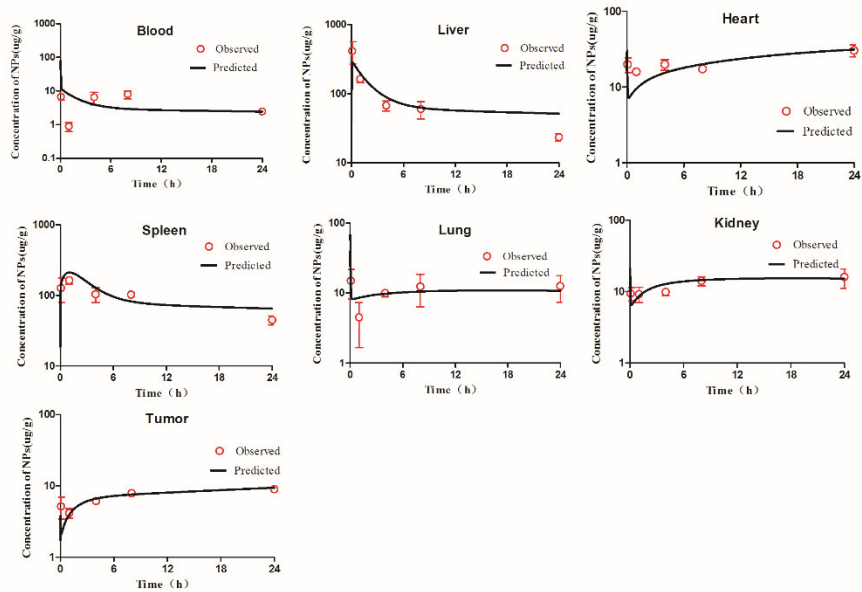

**Figure S6.** The simulated and experimentally measured concentration of mPEG5k-9.09%-200nm NPs in mice blood and tissues after intravenous injection.

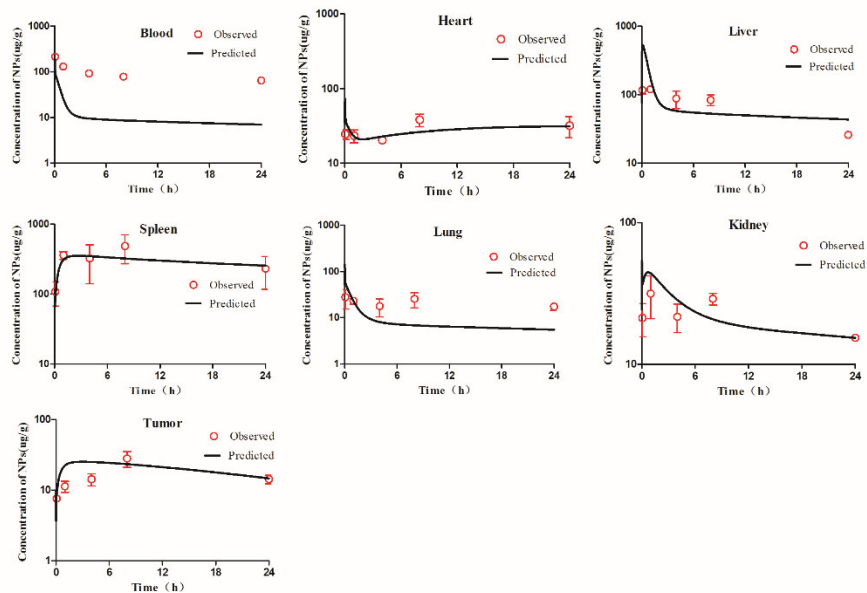

**Figure S7.** The simulated and experimentally measured concentration of mPEG5k-28.57%-200nm NPs in mice blood and tissues after intravenous injection.

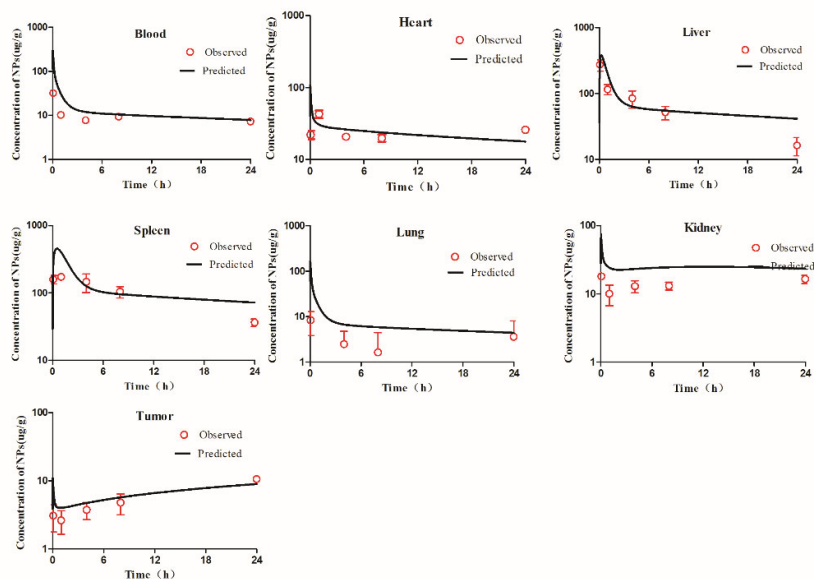

**Figure S8.** The simulated and experimentally measured concentration of mPEG2k-28.57%-200nm NPs in mice blood and tissues after intravenous injection.



### Goodness of fit of the EPR-PBPK model for NPs

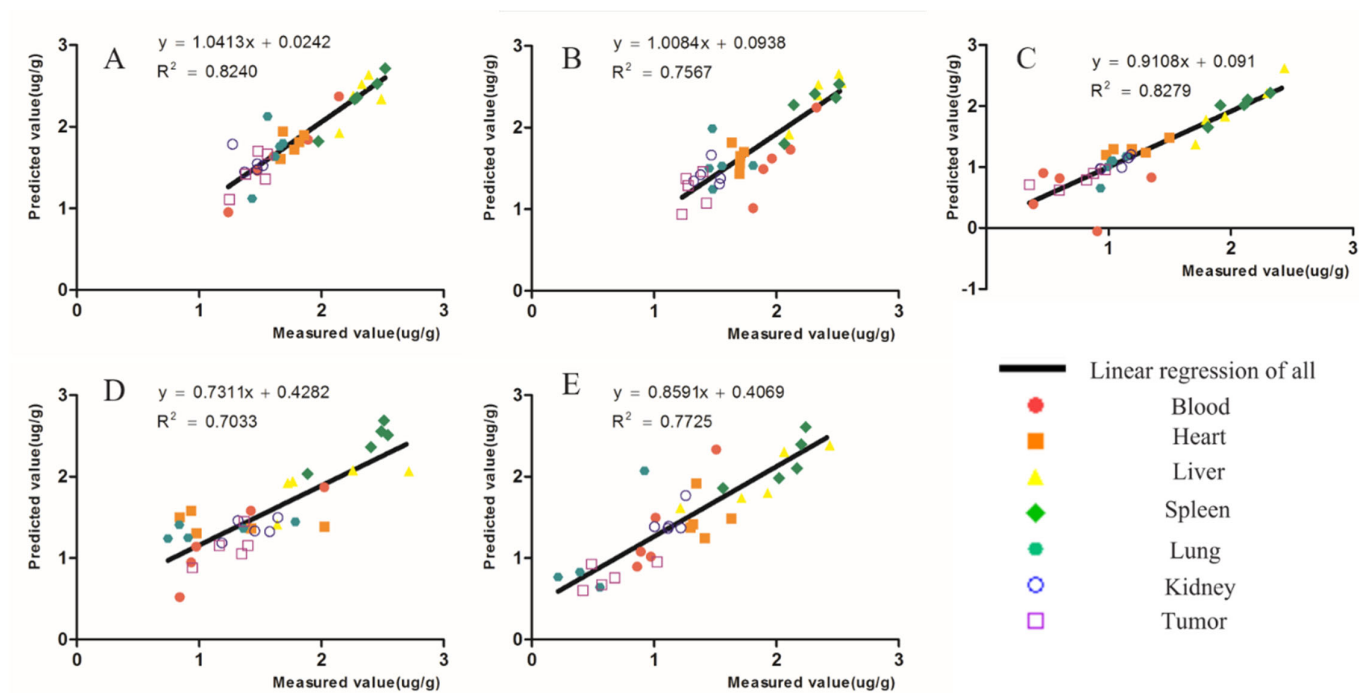

**Figure S9.** Goodness-of-fit plot of the linear regression analysis of model predictions and experimental data after intravenous injection for model calibration. Measured values are from our own experimental data. mPEG5k-9.09%-80nm NPs (A), mPEG5k-28.57%-80nm NPs (B), mPEG5k-9.09%-200nm NPs (C), mPEG5k-28.57%-200nm NPs (D) and mPEG2k-28.57%-200nm NPs (E)

## Mass balance equations of the PBPK model

Mass balance equations

For venous blood

$$V_{V_b} \frac{dCV_{V_b}}{dt} = Q_H CV_H + Q_L CV_L + Q_S CV_S + Q_K CV_K + Q_T CV_T + Q_{Bo} CV_{Bo} - Q_{Lu} CV_{V_b}$$

For arterial blood

$$V_A \frac{dC_A}{dt} = Q_{Lu} (CV_{Lu} - C_A)$$

For lung

For vascular space

$$V_{V_{Lu}} \frac{dCV_{Lu}}{dt} = Q_{Lu} (C_{V_b} - CV_{Lu}) - PA_{Lu} CV_{Lu} + \frac{PA_{Lu} C_{T_{Lu}}}{P_{Lu}} - k_{up_{Lu}} CV_{Lu} V_{V_{Lu}} + k_{release_{Lu}} A_{PC_{Lu}}$$

For tissue (interstitial space)

$$V_{T_{Lu}} \frac{dC_{T_{Lu}}}{dt} = PA_{Lu} CV_{Lu} - \frac{PA_{Lu} C_{T_{Lu}}}{P_{Lu}}$$

For phagocytic cell in lung

$$\frac{dA_{PC_{Lu}}}{dt} = k_{up_{Lu}} CV_{Lu} V_{V_{Lu}} - k_{release_{Lu}} A_{PC_{Lu}}$$

PCL-P2 NPs concentration in the lung is shown by:

$$dC_{Total_{Lu}} = \frac{CV_{Lu} V_{V_{Lu}} + C_{T_{Lu}} V_{T_{Lu}} + A_{PC_{Lu}}}{V_{Lu}}$$

For liver

For vascular space

$$V_{V_L} \frac{dCV_L}{dt} = Q_L CA + Q_S CV_S - (Q_L + Q_S) CV_L - PA_L CV_L + \frac{PA_L C_{T_L}}{P_L} - k_{up_L} CV_L V_{V_L} + k_{release_L} A_{PC_L}$$

For tissue (interstitial space)

$$V_{T_L} \frac{dC_{T_L}}{dt} = PA_L CV_L - \frac{PA_L C_{T_L}}{P_L}$$

For phagocytic cell in liver

$$\frac{dA_{PC_L}}{dt} = k_{up_L} CV_L V_{V_L} - k_{release_L} A_{PC_L}$$

PCL-P2 NPs concentration in the liver is shown by:

$$dC_{Total_L} = \frac{CV_L V_{V_L} + C_{T_L} V_{T_L} + A_{PC_L}}{V_L}$$

For spleen

For vascular space

$$V_{V_S} \frac{dCV_S}{dt} = Q_S (CA - CV_S) - PA_S CV_S + \frac{PA_S C_{T_S}}{P_S} - k_{up_S} CV_S V_{V_S} + k_{release_S} A_{PC_S}$$

For tissue (interstitial space)



$$V_{T,S} \frac{dC_{T,S}}{dt} = PA_S CV_S - \frac{PA_S C_{T,S}}{P_S}$$

For phagocytic cell in spleen

$$\frac{dA_{PC,S}}{dt} = k_{up,S} CV_S V_{V,S} - k_{release,S} A_{PC,S}$$

PCL-P2 NPs concentration in the spleen is shown by:

$$dC_{Total,S} = \frac{CV_S V_{V,S} + C_{T,S} V_{T,S} + A_{PC,S}}{V_S}$$

For kidney

$$V_{V,K} \frac{dCV_K}{dt} = Q_K (CA - CV_K) - PA_K CV_K + \frac{PA_K C_{T,K}}{P_K} - k_{up,K} CV_K V_{V,K} + k_{release,K} A_{PC,K}$$

For tissue (interstitial space)

$$V_{T,K} \frac{dC_{T,K}}{dt} = PA_K CV_K - \frac{PA_K C_{T,K}}{P_K}$$

For phagocytic cell in kidney

$$\frac{dA_{PC,K}}{dt} = k_{up,K} CV_K V_{V,K} - k_{release,K} A_{PC,K}$$

PCL-P2 NPs concentration in the kidney is shown by:

$$dC_{Total,K} = \frac{CV_K V_{V,K} + C_{T,K} V_{T,K} + A_{PC,K}}{V_K}$$

For heart

For vascular space

$$V_{V,H} \frac{dCV_H}{dt} = Q_H (CA - CV_H) - PA_H CV_H + \frac{PA_H C_{T,H}}{P_H} - k_{up,H} CV_H V_{V,H} + k_{release,H} A_{PC,H}$$

For tissue (interstitial space)

$$V_{T,H} \frac{dC_{T,H}}{dt} = PA_H CV_H - \frac{PA_H C_{T,H}}{P_H}$$

For phagocytic cell in heart

$$\frac{dA_{PC,H}}{dt} = k_{up,H} CV_H V_{V,H} - k_{release,H} A_{PC,H}$$

PCL-P2 NPs concentration in the heart is shown by:

$$dC_{Total,H} = \frac{CV_H V_{V,H} + C_{T,H} V_{T,H} + A_{PC,H}}{V_H}$$

For tumor

For vascular space

$$V_{V,T} \frac{dCV_T}{dt} = Q_T (CA - CV_T) - PA_T CV_T + \frac{PA_T C_{T,T}}{P_T} - k_{up,T} CV_T V_{V,T} + k_{release,T} A_{PC,T}$$

For tissue (interstitial space)

$$V_{T,T} \frac{dC_{T,T}}{dt} = PA_T CV_T - \frac{PA_T C_{T,T}}{P_T}$$

For phagocytic cell in tumor

$$\frac{dA_{PC,T}}{dt} = k_{up,T} CV_T V_{V,T} - k_{release,T} A_{PC,T}$$

PCL-P2 NPs concentration in the tumor is shown by:

$$dC_{Total_T} = \frac{CV_TV_{V_T} + C_{T,T}V_{T,T} + A_{PC,T}}{V_T}$$

For rest of body

$$V_{V_Bo} \frac{dCV_{Bo}}{dt} = Q_{Bo}(CA - CV_{Bo}) - PA_{Bo}CV_{Bo} + \frac{PA_{Bo}C_{T_Bo}}{P_{Bo}} - k_{up_Bo}CV_{Bo}V_{V_Bo} + k_{release_Bo}A_{PC_Bo}$$

For tissue (interstitial space)

$$V_{T_Bo} \frac{dC_{T_Bo}}{dt} = PA_{Bo}CV_{Bo} - \frac{PA_{Bo}C_{T_Bo}}{P_{Bo}}$$

For phagocytic cell in rest of body

$$\frac{dA_{PC_Bo}}{dt} = k_{up_Bo}CV_{Bo}V_{V_Bo} - k_{release_Bo}A_{PC_Bo}$$

PCL-P2 NPs concentration in the rest of body is shown by:

$$dC_{Total_Bo} = \frac{CV_{Bo}V_{V_Bo} + C_{T_Bo}V_{T_Bo} + A_{PC_Bo}}{V_{Bo}}$$

**The code in the PBPK model for IV injection of NPs**

The model for IV injection of PCL-P2 NPs

METHOD RK4

STARTTIME= 0

STOPTIME=24

DTMAX = 0.01

DTOUT =0.1

; Physiological constants (kg)

BW = 0.04 ; body weight

; Dose (ul)

IV = 200

; Organ volumes (fraction of body weight)

VLuC=0.007 ; Lung; Brown et al, 1997

VLC=0.0549 ; Liver; Brown et al, 1997

VSC=0.005 ; Spleen; Davies and Morris 1993

VKC=0.0167 ; Kidneys; Brown et al. 1997

VHC=0.005 ; Lung; Brown et al, 1997

VTC=0.055 ; Calculated from the data from literature

VBloodC=0.085 ; Blood; Davies and Morris 1993

VBoC=1-(VLC+VKC+VSC+VHC+VTC+VBloodC) ; Rest of body

; Organ volumes (L)

VBlood=VBloodC\*BW

VLu=VLuC\*BW ; Lung

VL=VLC\*BW ; Liver

VS=VSC\*BW ; Spleen

VK=VKC\*BW ; Kidneys

VH=VHC\*BW ; Heart

VT=VTC\*BW ; Tumor

VA = 0.2\*VBloodC\*BW ; Arterial blood

VV = 0.8\*VBloodC\*BW ; Venous blood

VBo=VBoC\*BW ; Rest of body

; Organ blood volumes (L)

$V_{LuVES} = 0.5 \cdot V_{Lu}$  ; Lung; Brown et al, 1997

$V_{LVES} = 0.31 \cdot V_L$  ; Liver; Brown et al, 1997

$V_{SVES} = 0.17 \cdot V_S$  ; Spleen; Brown et al, 1997

$V_{KVES} = 0.24 \cdot V_K$  ; Kidneys; Brown et al, 1997

$V_{HVES} = 0.34 \cdot V_H$  ; Heart fitted from the software

$V_{TVES} = 0.035 \cdot V_T$  ; Tumor fitted from the software

$V_{BoVES} = 0.04 \cdot V_{Bo}$  ; Rest of body; Lin et al, 2015; Brown et al, 1997

; Organ tissue (interstitial) volumes (L)

$V_{LuT} = 0.3 \cdot V_{Lu}$  ; Lung; Calculated from Davda et al, 2008

$V_{LT} = 0.26 \cdot V_L$  ; Liver; Calculated from Davda et al, 2008

$V_{ST} = 0.2 \cdot V_S$  ; Spleen; Calculated from Davda et al, 2008

$V_{KT} = 0.34 \cdot V_K$  ; Kidneys; Calculated from Davda et al, 2008

$V_{HT} = 0.143 \cdot V_H$  ; Heart; Calculated from Davda et al, 2008

$V_{TT} = 0.38 \cdot V_T$  ; Tumor; Calculated from Davda et al, 2008

$V_{BoT} = 0.21 \cdot V_{Bo}$  ; Rest of body; Calculated from Davda et al, 2008

; Blood flow rate (fraction of cardiac output)

$Q_{CC} = 16.5$  ; Cardiac output constant; Brown et al, 1997

$Q_{LC} = 0.161$  ; Liver; Brown et al, 1997.

$Q_{KC} = 0.091$  ; Kidney; Brown et al, 1997

$Q_{SC} = 0.01125$  ; Spleen; Lin et al, 2015; Davies and Morris, 1993

$Q_{HC} = 0.066$  ; Heart; Brown et al, 1997

$Q_{TC} = 0.0125$  ; Tumor; Calculated from Davda et al, 2008

$Q_{BoC} = 1 - (Q_{LC} + Q_{SC} + Q_{KC} + Q_{HC} + Q_{TC})$  ; Rest of body

; Cardiac output and regional blood flow (L/h)

$Q_C = Q_{CC} \cdot BW^{0.75}$

$Q_{Lu} = Q_C$  ; Lung

$Q_L = Q_{LC} \cdot Q_C$  ; Liver

$Q_S = Q_{SC} \cdot Q_C$  ; Spleen

$Q_K = Q_{KC} \cdot Q_C$  ; Kidneys

$QT=QTC*QC$  ;Tumor

$QH=QHC*QC$  ; Heart

$QBo=QBoC*QC$  ; Rest of body

; Distribution coefficients (PC), unitless

$PLu = 0.15$  ; Lung

$PL = 0.08$  ; Liver

$PS = 0.15$  ; Spleen

$PK = 0.15$  ; Kidneys

$PT = 0.15$  ; Tumor

$PH = 0.15$  ; Heart

$PBo = 0.15$  ; Rest of body

; Diffusion limitation coefficient constants, unitless

$PALuC = 0.001$  ; Lung

$PALC = 0.001$  ; Liver

$PASC = 0.03$  ; Spleen

$PAKC = 0.001$  ; Kidneys

$PATC = 0.001$  ; Tumor

$PAHC = 0.001$  ; Heart

$PABoC = 0.001$  ; Rest of body

; Permeability coefficient-surface area cross-product

$PALu = PALuC*QLu$  ; Lung

$PAL = PALC*QL$  ; Liver

$PAS = PASC*QS$  ; Spleen

$PAH = PAHC*QH$  ; Heart

$PAT = PATC*QT$  ; Tumor

$PAK = PAKC*QK$  ; Kidneys

$PABo = PABoC*QBo$  ; Rest of body

; Phagocytosis-related parameters; Lu, L, K, S, and Bo represent the lung, liver, kidneys, and rest of body, respectively

$KupLumax=2.95062$

KupLu50=0.0501613

KupLun=0.569474

KoutLu=1.99111e-8

$KupLu = ((KupLumax * time^{KupLun}) / (KupLu50^{KupLun} + time^{KupLun}))$

KupHmax=6.2

KupH50 =150

KupHn=2.3e-4

KoutH=1.3e-9

$KupH = ((KupHmax * time^{KupHn}) / (KupH50^{KupHn} + time^{KupHn}))$  KupHmax=0.0026

KupTmax=6.3

KupT50=0.68

KupTn=0.0131083

KoutT=0.0034

$KupT = ((KupTmax * time^{KupTn}) / (KupT50^{KupTn} + time^{KupTn}))$

KupLmax=14

KupL50=0.00956512

KupLn=160

KoutL=0.0257

$KupL = ((KupLmax * time^{KupLn}) / (KupL50^{KupLn} + time^{KupLn}))$

KupSmax=170

KupS50=60

KupSn=0.14

KoutS=0.111701

$KupS = ((KupSmax * time^{KupSn}) / (KupS50^{KupSn} + time^{KupSn}))$

KupKmax=4.5

KupK50 =52.9899

KupKn=0.0056163

KoutK=1.60941e-8

$KupK = ((KupKmax * time^{KupKn}) / (KupK50^{KupKn} + time^{KupKn}))$

KupBomax=20.1296

KupBo50=0.034

KupBon=8.48464

KoutBo =3.37e-6

$KupBo = ((KupBomax * time^{KupBon}) / (KupBo50^{KupBon} + time^{KupBon}))$

; Urine and biliary excretion

Kurine=0.0012

Kbile=0.0012

; Blood compartment

; Venous blood concentration

$d/dt (AV) = (QL * CVL + QS * CVL + QK * CVK + QT * CVT + QH * CVH + QBo * CVBo) - (QC * CV)$

init AV = IV

$CV = AV / VV$

; Arterial blood concentration

$d/dt (AA) = QC * (CVLu - CA)$

init AA = 0

$CA = AA / VA$

$CBlood = CA + CV$

; Lung compartment; VES, T and RES represent blood vessels, tissue, and phagocytic cells

$d/dt (ALuVES) = QLu * (CV - CVLu) - PALu * CVLu + (PALu * CLuT) / PLu + KoutLu * ALuRES -$

$KupLu * ALuVES$

init ALuVES = 0

$CVLu = ALuVES / VLuVES$

$d/dt (ALuT) = PALu * CVLu - (PALu * CLuT) / PLu$

init ALuT = 0

$CLuT = ALuT / VLuT$

$d/dt (ALuRES) = KupLu * ALuVES - KoutLu * ALuRES$

init ALuRES = 0

$CLung = (ALuVES + ALuT + ALuRES) / VLu$

; Liver compartment

$d/dt (ALVES) = QL * CA + QS * CVS - (QL + QS) * CVL - PAL * CVL + (PAL * CLT) / PL + KoutL * ALRES$

- KupL\*ALVES - Kbile\*CVL

init ALVES = 0

CVL = ALVES/VLVES

d/dt (Abile) = Kbile\*CVL

init Abile = 0

d/dt (ALT) = PAL\*CVL - (PAL\*CLT)/PL

init ALT = 0

CLT = ALT/VLT

d/dt (ALRES) = KupL \*ALVES - KoutL \*ALRES

init ALRES = 0

CLiver = (ALVES+ALT+ALRES)/VL

; Spleen compartment

d/dt (ASVES) = QS\*(CA-CVS) - PAS\*CVS + (PAS\*CST)/PS+ KoutS \*ASRES - KupS \*ASVES

init ASVES = 0

CVS = ASVES/VSVES

d/dt (AST) = PAS\*CVS - (PAS\*CST)/PS

init AST = 0

CST = AST/VST

d/dt (ASRES) = KupS \*ASVES - KoutS \*ASRES

init ASRES = 0

CSpleen = (ASVES+AST+ASRES)/VS

; Kidney compartment

d/dt (AKVES) = QK\*(CA-CVK) - PAK\*CVK + (PAK\*CKT)/PK - Kurine\*CVK+ KoutK \*AKRES

- KupK \*AKVES

init AKVES = 0

CVK = AKVES/VKVES

d/dt (Aurine) = Kurine\*CVK

init Aurine = 0

d/dt (AKT) = PAK\*CVK - (PAK\*CKT)/PK

init AKT = 0



$$\text{CKT} = \text{AKT}/\text{VKT}$$

$$d/dt (\text{AKRES}) = \text{KupK} * \text{AKVES} - \text{KoutK} * \text{AKRES}$$

$$\text{init AKRES} = 0$$

$$\text{CKidney} = (\text{AKVES} + \text{AKT} + \text{AKRES})/\text{VK}$$

; Heart compartment

$$d/dt (\text{AHVES}) = \text{QH} * (\text{CA} - \text{CVH}) - \text{PAH} * \text{CVH} + (\text{PAH} * \text{CHT})/\text{PH} + \text{KoutH} * \text{AHRES} - \text{KupH} * \text{AHVES}$$

$$\text{init AHVES} = 0$$

$$\text{CVH} = \text{AHVES}/\text{VHVES}$$

$$d/dt (\text{AHT}) = \text{PAH} * \text{CVH} - (\text{PAH} * \text{CHT})/\text{PH}$$

$$\text{init AHT} = 0$$

$$\text{CHT} = \text{AHT}/\text{VHT}$$

$$d/dt (\text{AHRES}) = \text{KupH} * \text{AHVES} - \text{KoutH} * \text{AHRES}$$

$$\text{init AHRES} = 0$$

$$\text{CHheart} = (\text{AHVES} + \text{AHT} + \text{AHRES})/\text{VH}$$

; Tumor compartment

$$d/dt (\text{ATVES}) = \text{QT} * (\text{CA} - \text{CVT}) - \text{PAK} * \text{CVT} + (\text{PAK} * \text{CTT})/\text{PT} + \text{KoutT} * \text{ATRES} - \text{KupT} * \text{ATVES}$$

$$\text{init ATVES} = 0$$

$$\text{CVT} = \text{ATVES}/\text{VTVES}$$

$$d/dt (\text{ATT}) = \text{PAT} * \text{CVT} - (\text{PAT} * \text{CTT})/\text{PT}$$

$$\text{init ATT} = 0$$

$$\text{CTT} = \text{ATT}/\text{VTT}$$

$$d/dt (\text{ATRES}) = \text{KupT} * \text{ATVES} - \text{KoutT} * \text{ATRES}$$

$$\text{init ATRES} = 0$$

$$\text{CTumor} = (\text{ATVES} + \text{ATT} + \text{ATRES})/\text{VT}$$

; Rest of body compartment

$$d/dt (\text{ABoVES}) = \text{QBo} * (\text{CA} - \text{CVBo}) - \text{PABo} * \text{CVBo} + (\text{PABo} * \text{CBoT})/\text{PBo} + \text{KoutBo} * \text{ABoRES} - \text{KupBo} * \text{ABoVES}$$

$$\text{init ABoVES} = 0$$

$$\text{CVBo} = \text{ABoVES}/\text{VBoVES}$$

$$d/dt (ABoT) = PABo * CVBo - (PABo * CBoT) / PBo$$

$$\text{init } ABoT = 0$$

$$CBoT = ABoT / VBoT$$

$$d/dt (ABoRES) = KupBo * ABoVES - KoutBo * ABoRES$$

$$\text{init } ABoRES = 0$$

$$CBody = (ABoVES + ABoT + ABoRES) / VBo$$

**References:**

- (1) Brown, R. P.; Delp, M. D.; Lindstedt, S. L.; Rhomberg, L. R.; Beliles, R. P. Physiological Parameter Values for Physiologically Based Pharmacokinetic Models. *Toxicol Ind Health* **1997**, *13*, 407-84.
- (2) Davies, B.; Morris, T. Physiological Parameters in Laboratory Animals and Humans. *Pharm Res* **1993**, *10*, 1093-5.
- (3) Davda, J. P.; Jain, M.; Batra, S. K.; Gwilt, P. R.; Robinson, D. H. A physiologically based pharmacokinetic (PBPK) model to characterize and predict the disposition of monoclonal antibody CC49 and its single chain Fv constructs. *International Immunopharmacology* **2008**, *8*, 401-413.
